# Supplementary material for: CryoSat Long-Term Ocean Data Analysis and Validation: Final Words on GOP Baseline-C
Source: MDPI journal article supplement (doi:10.3390/rs15225420), 2023-11-19
Supplement: s1 [file s1]

# CryoSat Long-Term Ocean Data Analysis and Validation: Final Words on GOP Baseline-C

Marc Naeije <sup>1,\*</sup> , Alessandro Di Bella <sup>2</sup>, Teresa Geminale <sup>3</sup> and Pieter Visser <sup>1</sup>

<sup>1</sup> Department of Space Engineering, FAC Aerospace Engineering, Delft University of Technology (TU Delft), Kluyverweg 1, 2629 HS Delft, The Netherlands

<sup>2</sup> ESA Centre for Earth Observation ESA/ESRIN, Largo Galileo Galilei 1, 00044 Frascati, RM, Italy

<sup>3</sup> Exprivia S.p.A. Defence & Aerospace Digital Factory, Via della Bufalotta 378, 00139 Roma, RM, Italy

\* Correspondence: m.c.naeije@tudelft.nl; Tel.: +31-1527-8-3831

---

## Supplementary materials

In this supplement we present some material that we think could be of use for the reader and user of CryoSat-2 GOP Baseline-C data. It complements the material for the accompanying paper but would have made the paper too long when incorporated in the paper itself.

In our CryoSat-2 vs. concurrent altimetry we present in the paper the geographical maps for average bias for SLA, SWH and wind speed. Here, Figure S1 gives the result for mean crossover difference for backscatter ( $\sigma^0$ ) between GOP Cryosat-2 and all the other concurrent altimeter satellite missions/phases, and Figure S2 for sea state bias (SSB). Due to CryoSat-2's orbit, the number of crossovers within  $|\Delta t| < 2$  days is limited which results in a typical banded pattern for the case where GOP CryoSat-2 crosses RADS CryoSat-2. As with the SLA, SWH and wind speed plots in the paper, these plots give insight on how the biases are distributed geographically. They have been averaged over the period in which the two crossing satellites overlap. In the  $\sigma^0$  (Figure S1) we notice outstanding biases for Jason-3/a and Sentinel 6A, and in the sea state bias (Figure S2) outstanding differences with the SARALs and to a lesser extend with Jason-2/a. Though sea state bias should not be compared directly because they are tailored to each satellite/mission/phase (except for CryoSat-2 GOP Baseline-C).

In our CryoSat-2 vs. tide gauges we present the statistics of the differences of CryoSat-2 GOP Baseline-C ('cg') and our reference missions Jason-2 and Jason-3 ('ref') with a selected set of 309 tide gauges from the PSMSL sea level service. Here, in Table S1, we give the results for each individual station. Obviously this table is too long to incorporate in the paper.

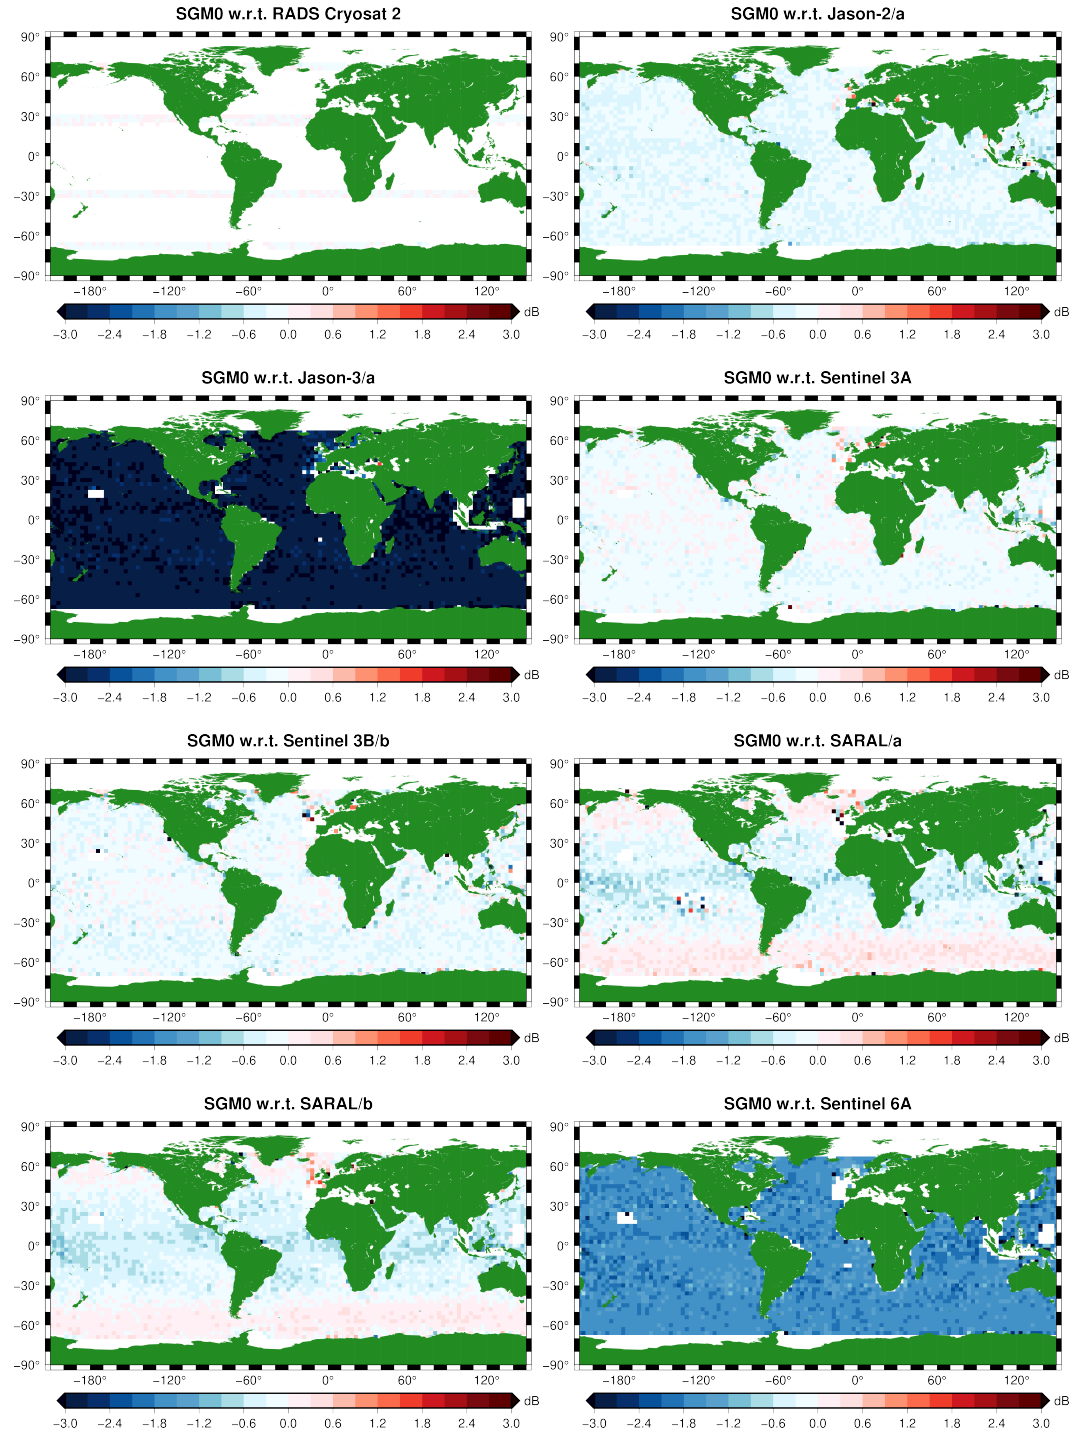

**Figure S1.** Mean backscatter ( $\sigma^0$ ) crossover differences between GOP CryoSat-2 and the concurrent altimeter missions RADS CryoSat-2, Jason-2, Jason-3, Sentinel-3A, Sentinel-3B, SARAL, and Sentinel-6A.

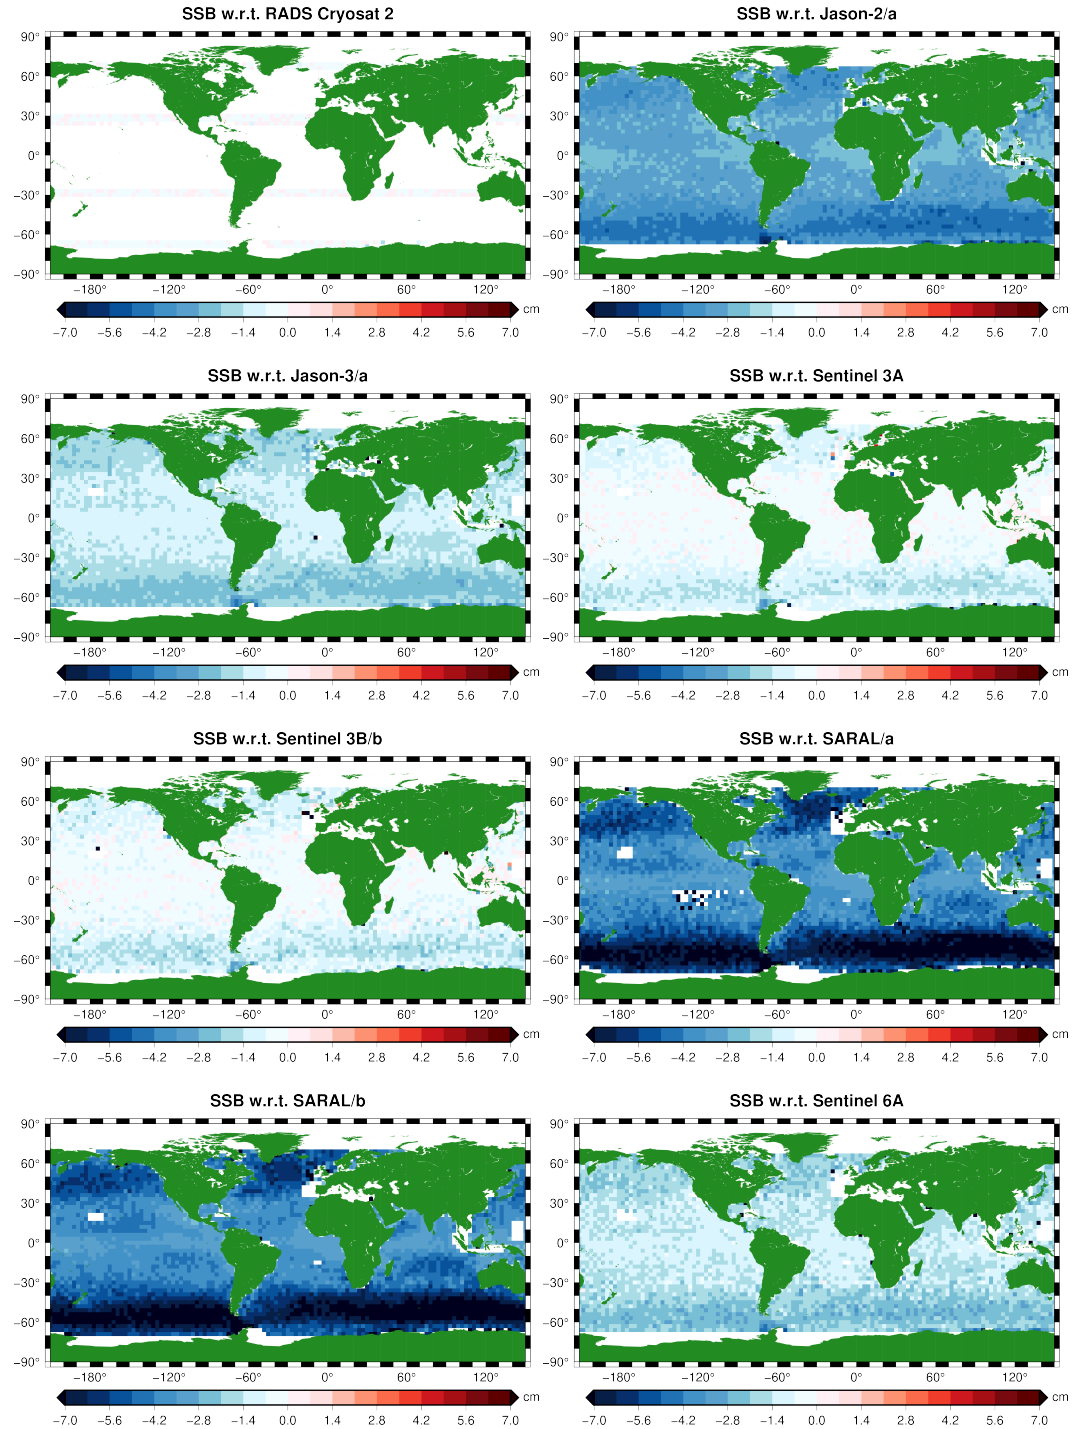

**Figure S2.** Mean sea state bias (SSB) crossover differences between GOP CryoSat-2 and the concurrent altimeter missions RADS CryoSat-2, Jason-2, Jason-3, Sentinel-3A, Sentinel-3B, SARAL, and Sentinel-6A.

**Table S1.** Statistics comparing PSMSL tide gauges with GOP CryoSat-2 (index 'cg') and Jason-2/Jason-3 (index 'ref'). Given are station name, location, correlation R, standard deviation  $\sigma$ , slope  $y'$  between tide gauge and altimeter data, and GIA correction.

| Station         | lon     | lat    | R <sub>cg</sub> | R <sub>ref</sub> | $\sigma_{cg}$ | $\sigma_{ref}$ | $y'_{cg}$ | $y'_{ref}$ | GIA   |
|-----------------|---------|--------|-----------------|------------------|---------------|----------------|-----------|------------|-------|
|                 | [°E]    | [°N]   |                 |                  | [cm]          |                | [mm/yr]   |            |       |
| BREST           | -4.49   | 48.38  | 0.785           | 0.821            | 0.058         | 0.053          | -2.18     | 1.47       | 0.22  |
| SAN FRANCISCO   | -122.47 | 37.81  | 0.800           | 0.661            | 0.039         | 0.048          | 2.03      | -0.38      | 0.42  |
| SAN JUAN        | -66.11  | 18.46  | 0.923           | 0.893            | 0.021         | 0.025          | 2.45      | 3.41       | 0.09  |
| OSHOBO II       | 140.86  | 43.21  | 0.906           | 0.873            | 0.036         | 0.048          | 2.28      | 0.44       | -0.34 |
| HIROSIMA        | 132.46  | 34.35  | 0.746           | 0.924            | 0.102         | 0.052          | 2.59      | 1.96       | -0.43 |
| STONY POINT     | 145.22  | -38.37 | 0.713           | 0.863            | 0.071         | 0.039          | 0.77      | -0.36      | -0.33 |
| TAI PO KAU, TOL | 114.18  | 22.44  | 0.761           | 0.872            | 0.076         | 0.059          | 3.31      | 3.24       | -0.34 |
| MATSUYAMA II    | 132.71  | 33.86  | 0.659           | 0.892            | 0.119         | 0.059          | 5.16      | 4.77       | -0.43 |
| WHANGAREI HARBO | 174.35  | -35.76 | 0.703           | 0.722            | 0.044         | 0.043          | -0.64     | -1.15      | -0.29 |
| JEJU            | 126.54  | 33.53  | 0.898           | 0.949            | 0.061         | 0.042          | 2.52      | 0.51       | -0.31 |
| BRIDGEPORT      | -73.18  | 41.17  | 0.823           | 0.794            | 0.049         | 0.050          | 0.11      | -0.86      | 1.12  |
| PORT HARDY      | -127.48 | 50.72  | 0.836           | 0.903            | 0.058         | 0.046          | 4.25      | 2.98       | -0.29 |
| AWA SIMA        | 139.25  | 38.47  | 0.901           | 0.868            | 0.047         | 0.060          | 2.25      | 2.60       | -0.42 |
| HAKATA          | 130.41  | 33.62  | 0.919           | 0.943            | 0.054         | 0.045          | -1.92     | -0.57      | -0.42 |
| SAIGO           | 133.33  | 36.20  | 0.949           | 0.959            | 0.039         | 0.037          | 0.44      | -1.83      | -0.28 |
| NISINOOMOTE     | 130.99  | 30.73  | 0.923           | 0.822            | 0.053         | 0.089          | -0.74     | 4.17       | -0.19 |
| OSAKA           | 135.43  | 34.66  | 0.893           | 0.917            | 0.056         | 0.049          | 5.10      | 0.36       | -0.45 |
| NAGASAKI        | 129.87  | 32.73  | 0.907           | 0.963            | 0.061         | 0.038          | 0.39      | -1.04      | -0.35 |
| FUKUE           | 128.85  | 32.70  | 0.920           | 0.967            | 0.057         | 0.035          | -0.24     | -0.12      | -0.31 |
| OURA            | 130.22  | 32.98  | 0.889           | 0.937            | 0.067         | 0.050          | 5.73      | 5.37       | -0.38 |
| WAKKANAI        | 141.69  | 45.41  | 0.834           | 0.803            | 0.040         | 0.043          | -0.76     | -0.49      | -0.34 |
| ABASHIRI        | 144.29  | 44.02  | 0.681           | 0.510            | 0.050         | 0.061          | 2.83      | 5.86       | -0.40 |
| NAKANO SIMA     | 129.85  | 29.84  | 0.939           | 0.908            | 0.045         | 0.058          | -0.98     | 0.53       | -0.13 |
| FORT MYERS      | -81.87  | 26.65  | 0.816           | 0.873            | 0.055         | 0.044          | -2.58     | -1.60      | 0.12  |
| NAPLES          | -81.81  | 26.13  | 0.860           | 0.914            | 0.047         | 0.036          | -3.55     | -3.61      | 0.12  |
| MUKHO           | 129.12  | 37.55  | 0.784           | 0.756            | 0.057         | 0.061          | 3.55      | 5.56       | -0.30 |
| FREMANTLE       | 115.74  | -32.06 | 0.776           | 0.837            | 0.068         | 0.052          | -4.58     | -4.83      | -0.25 |
| NANTUCKET ISLAN | -70.10  | 41.28  | 0.793           | 0.836            | 0.044         | 0.037          | -1.76     | -1.34      | 1.30  |
| HELGEROA        | 9.86    | 59.00  | 0.758           | 0.724            | 0.071         | 0.072          | -0.42     | 1.90       | -3.04 |
| ESPERANCE       | 121.90  | -33.87 | 0.727           | 0.845            | 0.056         | 0.042          | 0.78      | -0.06      | -0.18 |
| FERNANDINA BEAC | -81.47  | 30.67  | 0.724           | 0.906            | 0.093         | 0.049          | -1.05     | -1.87      | 0.35  |
| SASEBO II       | 129.72  | 33.16  | 0.913           | 0.955            | 0.060         | 0.044          | -0.40     | -0.32      | -0.38 |
| TAJIRI          | 134.32  | 35.59  | 0.951           | 0.945            | 0.042         | 0.044          | -3.93     | -4.30      | -0.39 |
| NAHA            | 127.67  | 26.21  | 0.924           | 0.956            | 0.046         | 0.035          | 1.65      | 0.59       | -0.15 |
| PATRICIA BAY    | -123.45 | 48.65  | 0.755           | 0.820            | 0.073         | 0.059          | -0.99     | 0.90       | 0.26  |
| CAPE MAY        | -74.96  | 38.97  | 0.755           | 0.819            | 0.066         | 0.059          | -1.67     | -0.82      | 1.20  |
| BUNDABERG, BURN | 152.38  | -24.77 | 0.516           | 0.635            | 0.091         | 0.063          | -4.13     | -3.84      | -0.27 |
| DAUPHIN ISLAND  | -88.08  | 30.25  | 0.880           | 0.873            | 0.056         | 0.053          | -2.36     | -5.71      | 0.44  |
| BROOME          | 122.22  | -18.00 | 0.775           | 0.847            | 0.078         | 0.060          | 1.28      | -4.84      | -0.23 |
| MILNER BAY (GRO | 136.42  | -13.86 | 0.973           | 0.984            | 0.051         | 0.039          | -1.78     | -1.88      | -0.25 |
| APALACHICOLA    | -84.98  | 29.73  | 0.850           | 0.911            | 0.058         | 0.043          | -4.27     | -3.84      | 0.42  |
| SOUTH BEACH     | -124.04 | 44.62  | 0.744           | 0.643            | 0.078         | 0.088          | 1.99      | 1.18       | 1.09  |
| NEW YORK (THE B | -74.01  | 40.70  | 0.792           | 0.748            | 0.062         | 0.063          | 2.35      | -1.44      | 1.26  |
| TOKUYAMA II     | 131.80  | 34.04  | 0.661           | 0.915            | 0.119         | 0.056          | -1.42     | -0.47      | -0.44 |
| SPIKARNA        | 17.53   | 62.36  | 0.894           | 0.967            | 0.080         | 0.044          | 0.59      | -0.51      | -8.01 |
| UWAJIMA II      | 132.55  | 33.23  | 0.894           | 0.825            | 0.053         | 0.078          | -1.98     | -3.63      | -0.41 |
| SPRING BAY      | 147.93  | -42.55 | 0.667           | 0.539            | 0.056         | 0.062          | 0.20      | -0.68      | -0.18 |
| LEROS           | 26.85   | 37.13  | 0.717           | 0.863            | 0.051         | 0.038          | 1.46      | -2.47      | 0.04  |
| GOTEBORG - TORS | 11.79   | 57.68  | 0.820           | 0.796            | 0.066         | 0.067          | 1.26      | 2.03       | -1.85 |
| KHALKIS NORTH   | 23.59   | 38.47  | 0.793           | 0.819            | 0.054         | 0.047          | 3.49      | 1.71       | -0.04 |
| RORVIK          | 11.23   | 64.86  | 0.772           | 0.934            | 0.088         | 0.056          | 0.45      | 2.70       | -2.06 |
| BAMFIELD        | -125.13 | 48.85  | 0.857           | 0.866            | 0.058         | 0.056          | 5.10      | 1.22       | 0.60  |
| PORT TUDY       | -3.45   | 47.64  | 0.808           | 0.790            | 0.051         | 0.052          | 2.58      | 3.82       | 0.12  |

Table S1. (continued)

| Station         | lon     | lat    | R <sub>cg</sub> | R <sub>ref</sub> | $\sigma_{cg}$ | $\sigma_{ref}$ | $y'_{cg}$ | $y'_{ref}$ | GIA   |
|-----------------|---------|--------|-----------------|------------------|---------------|----------------|-----------|------------|-------|
|                 | [°E]    | [°N]   |                 |                  | [cm]          |                | [mm/yr]   |            |       |
| OGA             | 139.71  | 39.94  | 0.848           | 0.798            | 0.057         | 0.066          | 4.43      | 3.22       | -0.34 |
| AKUNE           | 130.19  | 32.02  | 0.924           | 0.941            | 0.053         | 0.046          | -1.20     | -1.39      | -0.29 |
| CHARLESTON II   | -124.32 | 43.34  | 0.788           | 0.549            | 0.065         | 0.085          | 3.43      | 1.54       | 0.91  |
| SEATTLE         | -122.34 | 47.60  | 0.790           | 0.778            | 0.066         | 0.060          | -5.00     | -3.20      | 0.70  |
| OITA II         | 131.69  | 33.27  | 0.754           | 0.826            | 0.089         | 0.080          | -0.71     | -4.33      | -0.42 |
| CAMBRIDGE II    | -76.07  | 38.57  | 0.728           | 0.799            | 0.083         | 0.065          | 2.89      | 0.37       | 0.92  |
| CABO DE SAN ANT | -84.90  | 21.90  | 0.730           | 0.729            | 0.053         | 0.052          | -3.55     | -3.32      | 0.26  |
| NORTH SYDNEY    | -60.25  | 46.22  | 0.724           | 0.704            | 0.049         | 0.048          | -1.28     | 1.22       | 1.45  |
| CONCARNEAU      | -3.91   | 47.87  | 0.843           | 0.850            | 0.047         | 0.045          | -1.36     | 1.79       | 0.17  |
| WAJIMA          | 136.90  | 37.41  | 0.935           | 0.941            | 0.044         | 0.042          | -0.16     | -2.15      | -0.37 |
| KURE I          | 133.24  | 33.33  | 0.887           | 0.774            | 0.057         | 0.087          | -2.78     | -0.09      | -0.41 |
| ARGENTIA        | -53.98  | 47.30  | 0.863           | 0.718            | 0.040         | 0.053          | 0.25      | -0.96      | 0.27  |
| PORT TOWNSEND   | -122.76 | 48.11  | 0.771           | 0.800            | 0.072         | 0.060          | -0.47     | 1.42       | 0.50  |
| ROSCOFF         | -3.97   | 48.72  | 0.753           | 0.784            | 0.069         | 0.069          | -3.34     | 0.72       | 0.15  |
| PHILADELPHIA (P | -75.14  | 39.93  | 0.627           | 0.602            | 0.097         | 0.101          | -1.18     | -2.85      | 1.25  |
| MONTEREY        | -121.89 | 36.60  | 0.850           | 0.824            | 0.034         | 0.035          | 2.27      | -0.13      | 0.40  |
| TOKE POINT, WIL | -123.97 | 46.71  | 0.750           | 0.567            | 0.098         | 0.118          | 1.21      | -0.85      | 1.29  |
| SOKCHO          | 128.59  | 38.21  | 0.760           | 0.772            | 0.063         | 0.061          | 3.36      | 3.77       | -0.32 |
| TSIM BEI TSUI   | 114.01  | 22.49  | 0.789           | 0.865            | 0.065         | 0.054          | -3.77     | -2.13      | -0.35 |
| KUCHINOTSU      | 130.20  | 32.61  | 0.907           | 0.951            | 0.059         | 0.042          | 1.28      | -0.20      | -0.35 |
| MAIZURU II      | 135.39  | 35.48  | 0.953           | 0.945            | 0.039         | 0.043          | -0.53     | -2.45      | -0.45 |
| OKINAWA         | 127.82  | 26.18  | 0.909           | 0.938            | 0.051         | 0.043          | 0.31      | -0.42      | -0.15 |
| TOYAMA          | 137.22  | 36.76  | 0.946           | 0.945            | 0.040         | 0.040          | 0.91      | -3.07      | -0.46 |
| CHICHIJIMA      | 142.18  | 27.08  | 0.911           | 0.960            | 0.040         | 0.027          | -5.51     | -2.76      | -0.18 |
| POINT REYES     | -122.98 | 37.99  | 0.762           | 0.552            | 0.043         | 0.058          | 1.96      | -0.66      | 0.50  |
| MANGALORE (PANA | 74.80   | 12.92  | 0.823           | 0.821            | 0.057         | 0.056          | -2.10     | -2.01      | -0.31 |
| GADEOKDO        | 128.81  | 35.02  | 0.895           | 0.928            | 0.055         | 0.045          | -3.01     | -1.37      | -0.44 |
| TONGYEONG       | 128.43  | 34.83  | 0.882           | 0.933            | 0.061         | 0.043          | 0.47      | 0.52       | -0.44 |
| LIME TREE BAY,  | -64.75  | 17.69  | 0.941           | 0.943            | 0.020         | 0.018          | 1.58      | 1.79       | 0.07  |
| SINES           | -8.88   | 37.95  | 0.794           | 0.869            | 0.038         | 0.029          | -0.33     | 1.07       | -0.08 |
| NICE            | 7.29    | 43.70  | 0.871           | 0.852            | 0.037         | 0.036          | 0.38      | 0.13       | 0.01  |
| PORT VENDRES    | 3.11    | 42.52  | 0.780           | 0.828            | 0.049         | 0.041          | -0.97     | 1.71       | -0.01 |
| HEUKSANDO       | 125.44  | 34.68  | 0.909           | 0.929            | 0.059         | 0.049          | 3.24      | 0.80       | -0.33 |
| ULLEUNG         | 130.91  | 37.49  | 0.839           | 0.821            | 0.063         | 0.066          | 3.50      | 1.68       | -0.13 |
| TOBERMORY       | -6.06   | 56.62  | 0.830           | 0.885            | 0.064         | 0.049          | 2.18      | -0.40      | -1.08 |
| POINTE DES GALE | 55.29   | -20.93 | 0.940           | 0.944            | 0.029         | 0.028          | -0.65     | 0.35       | -0.04 |
| NASE III        | 129.50  | 28.50  | 0.953           | 0.975            | 0.041         | 0.030          | 0.53      | -1.77      | -0.12 |
| TRIESTE         | 13.76   | 45.65  | 0.823           | 0.873            | 0.056         | 0.047          | 1.93      | 2.07       | -0.14 |
| GEOMUNDO        | 127.31  | 34.03  | 0.859           | 0.913            | 0.069         | 0.054          | -4.94     | -5.85      | -0.37 |
| PORTLAND        | 141.61  | -38.34 | 0.775           | 0.817            | 0.047         | 0.043          | 0.27      | 0.42       | -0.15 |
| HONOLULU        | -157.87 | 21.31  | 0.923           | 0.888            | 0.025         | 0.030          | -1.38     | -2.70      | -0.19 |
| ROOMPOT BUITEN  | 3.68    | 51.62  | 0.553           | 0.724            | 0.110         | 0.070          | -4.15     | 1.91       | -0.03 |
| WANDO           | 126.76  | 34.32  | 0.880           | 0.911            | 0.064         | 0.055          | -0.10     | -0.54      | -0.37 |
| SAN DIEGO (QUAR | -117.17 | 32.71  | 0.913           | 0.867            | 0.029         | 0.035          | -2.17     | 1.63       | 0.24  |
| HAMADA II       | 132.07  | 34.90  | 0.957           | 0.962            | 0.040         | 0.038          | -0.62     | -3.01      | -0.40 |
| IZUHARA II      | 129.29  | 34.20  | 0.934           | 0.953            | 0.049         | 0.040          | -3.34     | -2.02      | -0.43 |
| CHUJADO         | 126.30  | 33.96  | 0.876           | 0.907            | 0.066         | 0.057          | 1.51      | 1.11       | -0.33 |
| TAURANGA (SALIS | 176.18  | -37.64 | 0.587           | 0.680            | 0.056         | 0.039          | 4.36      | 0.87       | -0.43 |
| GISBORNE        | 178.02  | -38.68 | 0.711           | 0.712            | 0.043         | 0.040          | -1.52     | -2.26      | -0.34 |
| SEOGWIPO        | 126.56  | 33.24  | 0.888           | 0.914            | 0.062         | 0.054          | -3.73     | -3.51      | -0.29 |
| SAND POINT, POP | -160.50 | 55.34  | 0.923           | 0.946            | 0.057         | 0.049          | -3.70     | -4.47      | -0.15 |
| DUCK PIER OUTSI | -75.75  | 36.18  | 0.823           | 0.714            | 0.060         | 0.072          | 5.05      | 2.31       | 0.73  |
| BERGEN POINT, S | -74.14  | 40.64  | 0.761           | 0.743            | 0.068         | 0.064          | 4.23      | 0.34       | 1.27  |
| CLEARWATER BEAC | -82.83  | 27.98  | 0.841           | 0.860            | 0.057         | 0.054          | -1.59     | -4.46      | 0.23  |
| N. SPIT, HUMBOL | -124.22 | 40.77  | 0.793           | 0.829            | 0.049         | 0.045          | -0.92     | -2.02      | 0.64  |
| PANAMA CITY, ST | -85.67  | 30.15  | 0.893           | 0.924            | 0.049         | 0.040          | -1.63     | -2.50      | 0.43  |

Table S1. (continued)

| Station         | lon     | lat    | R <sub>cg</sub> | R <sub>ref</sub> | $\sigma_{cg}$ | $\sigma_{ref}$ | $y'_{cg}$ | $y'_{ref}$ | GIA   |
|-----------------|---------|--------|-----------------|------------------|---------------|----------------|-----------|------------|-------|
|                 | [°E]    | [°N]   |                 |                  | [cm]          |                | [mm/yr]   |            |       |
| PORT CHALMERS   | 170.62  | -45.81 | 0.648           | 0.795            | 0.052         | 0.033          | -0.55     | -2.18      | -0.34 |
| TOFINO          | -125.92 | 49.15  | 0.804           | 0.759            | 0.072         | 0.077          | 5.90      | 0.67       | 0.60  |
| VICTORIA        | -123.37 | 48.42  | 0.796           | 0.849            | 0.064         | 0.052          | -0.43     | -0.77      | 0.42  |
| PRINCE RUPERT   | -130.33 | 54.32  | 0.819           | 0.836            | 0.066         | 0.059          | 0.17      | 1.59       | -0.57 |
| ISHIGAKI II     | 124.16  | 24.33  | 0.944           | 0.966            | 0.044         | 0.034          | 2.58      | 1.88       | -0.07 |
| RODRIGUES IS    | 63.42   | -19.67 | 0.914           | 0.910            | 0.035         | 0.035          | -3.63     | -3.87      | -0.07 |
| PORT LOUIS II   | 57.50   | -20.15 | 0.944           | 0.954            | 0.028         | 0.026          | -1.52     | -1.19      | -0.09 |
| QUARRY BAY      | 114.21  | 22.29  | 0.745           | 0.895            | 0.077         | 0.053          | 3.74      | 3.68       | -0.33 |
| LAKE WORTH PIER | -80.03  | 26.61  | 0.702           | 0.658            | 0.072         | 0.074          | 1.65      | -0.65      | 0.17  |
| ANHEUNG         | 126.13  | 36.67  | 0.787           | 0.932            | 0.109         | 0.052          | 2.62      | -3.19      | -0.44 |
| VACA KEY        | -81.11  | 24.71  | 0.820           | 0.854            | 0.055         | 0.046          | 2.79      | -0.59      | 0.08  |
| KO LAK          | 99.82   | 11.80  | 0.916           | 0.964            | 0.066         | 0.044          | -2.34     | -3.91      | -0.36 |
| LES SABLES D OL | -1.79   | 46.50  | 0.749           | 0.745            | 0.064         | 0.062          | 2.48      | 0.14       | -0.04 |
| TRONDHEIM 2     | 10.39   | 63.44  | 0.802           | 0.924            | 0.081         | 0.046          | 2.62      | 2.16       | -3.07 |
| NAPIER          | 176.92  | -39.48 | 0.735           | 0.777            | 0.048         | 0.034          | -0.60     | -2.67      | -0.40 |
| SAN FELIX       | -80.11  | -26.29 | 0.554           | 0.564            | 0.039         | 0.039          | 4.17      | 5.10       | -0.19 |
| VIKER           | 10.95   | 59.04  | 0.724           | 0.702            | 0.084         | 0.082          | 0.41      | 3.29       | -3.51 |
| ROSSLYN BAY     | 150.79  | -23.16 | 0.704           | 0.654            | 0.077         | 0.070          | -0.02     | -3.79      | -0.36 |
| HILLARYS        | 115.74  | -31.83 | 0.800           | 0.856            | 0.064         | 0.048          | -3.22     | -4.05      | -0.25 |
| POINTE-A-PITRE  | -61.53  | 16.22  | 0.922           | 0.914            | 0.025         | 0.026          | 1.39      | 2.24       | 0.02  |
| TAKAMATSU II    | 134.06  | 34.35  | 0.814           | 0.891            | 0.084         | 0.063          | 3.04      | 2.70       | -0.44 |
| SMOGEN          | 11.22   | 58.35  | 0.771           | 0.759            | 0.072         | 0.070          | 1.70      | 3.08       | -2.68 |
| KOBE II         | 135.19  | 34.68  | 0.894           | 0.924            | 0.059         | 0.048          | 1.83      | -2.99      | -0.45 |
| PORT ERIN       | -4.77   | 54.09  | 0.775           | 0.753            | 0.068         | 0.082          | -1.06     | 1.96       | -0.59 |
| WORKINGTON      | -3.57   | 54.65  | 0.711           | 0.674            | 0.091         | 0.107          | -3.07     | -2.08      | -0.67 |
| WINTER HARBOUR  | -128.03 | 50.52  | 0.785           | 0.808            | 0.084         | 0.082          | 5.21      | 4.97       | 0.22  |
| ATLANTIC CITY   | -74.42  | 39.35  | 0.812           | 0.832            | 0.056         | 0.053          | -0.48     | -0.90      | 1.33  |
| LAS PALMAS D    | -15.41  | 28.14  | 0.870           | 0.902            | 0.028         | 0.023          | 0.12      | -0.41      | 0.05  |
| TENERIFE        | -16.24  | 28.48  | 0.888           | 0.933            | 0.029         | 0.022          | 0.03      | -0.08      | 0.09  |
| BETIO           | 172.93  | 1.37   | 0.943           | 0.957            | 0.021         | 0.018          | 0.83      | 0.58       | -0.14 |
| LAUTOKA         | 177.44  | -17.60 | 0.898           | 0.894            | 0.024         | 0.024          | 1.31      | 1.59       | -0.24 |
| BILBAO          | -3.05   | 43.35  | 0.774           | 0.767            | 0.047         | 0.045          | 0.56      | -0.73      | -0.16 |
| SANTANDER III   | -3.79   | 43.46  | 0.753           | 0.771            | 0.050         | 0.045          | 1.55      | -0.05      | -0.11 |
| LA CORUNA III   | -8.39   | 43.36  | 0.764           | 0.755            | 0.049         | 0.046          | 0.52      | 2.75       | 0.00  |
| BONANZA         | -6.34   | 36.80  | 0.783           | 0.783            | 0.046         | 0.043          | 2.12      | 0.34       | -0.20 |
| BARCELONA       | 2.17    | 41.34  | 0.835           | 0.814            | 0.046         | 0.053          | -0.91     | -0.25      | 0.03  |
| VALENCIA        | -0.31   | 39.44  | 0.808           | 0.860            | 0.050         | 0.041          | -1.00     | -3.37      | -0.11 |
| PORTLAND (MAIN  | -70.25  | 43.66  | 0.610           | 0.635            | 0.059         | 0.055          | 0.03      | 2.52       | -0.26 |
| LORNE           | 143.99  | -38.55 | 0.757           | 0.859            | 0.055         | 0.041          | 0.02      | -0.15      | -0.28 |
| MAJURO-C        | 171.37  | 7.11   | 0.977           | 0.966            | 0.016         | 0.020          | -0.31     | -1.25      | -0.14 |
| FUNAFUTI B      | 179.20  | -8.50  | 0.956           | 0.974            | 0.020         | 0.015          | -0.35     | -0.39      | -0.11 |
| PORT VILA B     | 168.31  | -17.76 | 0.887           | 0.869            | 0.030         | 0.032          | 3.34      | 4.47       | -0.08 |
| NUKU'ALOFA B    | -175.18 | -21.14 | 0.879           | 0.882            | 0.028         | 0.028          | -5.04     | -4.59      | -0.13 |
| RAROTONGA B     | -159.78 | -21.20 | 0.880           | 0.909            | 0.025         | 0.022          | -0.99     | -0.79      | -0.16 |
| NAURU-B         | 166.91  | -0.53  | 0.837           | 0.831            | 0.043         | 0.044          | -3.15     | -2.88      | -0.11 |
| VIRGINIA KEY, F | -80.16  | 25.73  | 0.736           | 0.798            | 0.067         | 0.058          | -0.20     | -2.22      | 0.11  |
| LOMBRUM         | 147.37  | -2.04  | 0.965           | 0.966            | 0.018         | 0.018          | -1.63     | -2.73      | 0.02  |
| HONIARA-B       | 159.96  | -9.43  | 0.975           | 0.968            | 0.020         | 0.026          | -1.96     | 0.30       | -0.17 |
| GIJON II        | -5.70   | 43.56  | 0.804           | 0.795            | 0.045         | 0.044          | 2.53      | 1.70       | -0.05 |
| KEY WEST        | -81.81  | 24.55  | 0.816           | 0.857            | 0.054         | 0.046          | 0.46      | -1.75      | 0.12  |
| HUELVA          | -6.83   | 37.13  | 0.848           | 0.845            | 0.038         | 0.037          | 0.02      | -1.28      | -0.20 |
| TAI MIU WAN     | 114.29  | 22.27  | 0.700           | 0.805            | 0.085         | 0.071          | 1.59      | -0.20      | -0.32 |
| SHEK PIK        | 113.89  | 22.22  | 0.797           | 0.875            | 0.066         | 0.053          | 2.56      | 3.06       | -0.33 |
| PORT BLOC       | -1.06   | 45.57  | 0.695           | 0.647            | 0.071         | 0.072          | 1.96      | -0.74      | -0.11 |
| LE CROUESTY     | -2.90   | 47.54  | 0.752           | 0.742            | 0.063         | 0.062          | 0.14      | 1.24       | 0.06  |
| HUPO            | 129.45  | 36.68  | 0.844           | 0.861            | 0.056         | 0.056          | 0.67      | 1.36       | -0.33 |

Table S1. (continued)

| Station         | lon     | lat    | R <sub>cg</sub> | R <sub>ref</sub> | $\sigma_{cg}$ | $\sigma_{ref}$ | $y'_{cg}$ | $y'_{ref}$ | GIA   |
|-----------------|---------|--------|-----------------|------------------|---------------|----------------|-----------|------------|-------|
|                 | [°E]    | [°N]   |                 |                  | [cm]          |                | [mm/yr]   |            |       |
| YEONGGWANG      | 126.42  | 35.43  | 0.723           | 0.883            | 0.118         | 0.066          | -2.65     | -4.24      | -0.42 |
| AJACCIO         | 8.76    | 41.92  | 0.912           | 0.940            | 0.033         | 0.028          | 0.86      | 0.83       | 0.21  |
| IBIZA           | 1.45    | 38.91  | 0.921           | 0.944            | 0.034         | 0.028          | -0.55     | -2.82      | 0.15  |
| SEONGSANPO      | 126.93  | 33.47  | 0.895           | 0.957            | 0.060         | 0.038          | -0.29     | -2.36      | -0.31 |
| MOTRIL 2        | -3.52   | 36.72  | 0.805           | 0.837            | 0.046         | 0.042          | -2.62     | -3.76      | -0.21 |
| VLISSINGEN      | 3.60    | 51.44  | 0.559           | 0.761            | 0.114         | 0.064          | -4.86     | 1.97       | -0.06 |
| ILE ROYALE      | -52.59  | 5.28   | 0.828           | 0.768            | 0.028         | 0.027          | -0.11     | -0.00      | -0.24 |
| FURUOGRUND      | 21.23   | 64.92  | 0.846           | 0.950            | 0.115         | 0.060          | -1.78     | -1.02      | -9.63 |
| CAP AUX MEULES  | -61.86  | 47.38  | 0.620           | 0.660            | 0.048         | 0.045          | 1.75      | 1.81       | 2.13  |
| GEOJEDO         | 128.70  | 34.80  | 0.890           | 0.927            | 0.060         | 0.048          | -1.50     | -1.16      | -0.44 |
| JINDO           | 126.31  | 34.38  | 0.877           | 0.898            | 0.066         | 0.060          | 1.81      | 1.94       | -0.36 |
| FUERTEVENTURA   | -13.86  | 28.49  | 0.847           | 0.935            | 0.029         | 0.019          | -1.38     | -1.24      | -0.01 |
| FERROL 2        | -8.25   | 43.48  | 0.744           | 0.710            | 0.052         | 0.052          | 0.68      | 3.34       | 0.01  |
| TARIFA 2        | -5.60   | 36.01  | 0.837           | 0.848            | 0.040         | 0.035          | 1.75      | -0.39      | -0.18 |
| ALGECIRAS 2     | -5.40   | 36.18  | 0.795           | 0.833            | 0.045         | 0.038          | 0.59      | -2.31      | -0.19 |
| ALMERIA 2       | -2.48   | 36.83  | 0.837           | 0.780            | 0.047         | 0.064          | 1.38      | -2.07      | -0.16 |
| MELILLA         | -2.93   | 35.29  | 0.824           | 0.851            | 0.048         | 0.053          | -1.23     | -3.72      | -0.18 |
| GANDIA          | -0.15   | 39.00  | 0.805           | 0.844            | 0.050         | 0.047          | 0.96      | 1.02       | -0.05 |
| SAGUNTO         | -0.21   | 39.63  | 0.813           | 0.855            | 0.049         | 0.041          | -0.47     | -3.93      | -0.11 |
| FORMENTERA      | 1.42    | 38.73  | 0.916           | 0.938            | 0.036         | 0.031          | -3.13     | -4.83      | 0.15  |
| PALMA DE MALLOR | 2.64    | 39.56  | 0.907           | 0.926            | 0.038         | 0.033          | 1.17      | -0.52      | 0.25  |
| MAHON           | 4.27    | 39.89  | 0.933           | 0.945            | 0.036         | 0.031          | -1.44     | -1.48      | 0.36  |
| ALCUDIA         | 3.14    | 39.83  | 0.921           | 0.935            | 0.035         | 0.031          | 0.60      | 0.51       | 0.29  |
| LA PALMA        | -17.77  | 28.68  | 0.861           | 0.907            | 0.031         | 0.026          | 2.20      | 2.12       | 0.08  |
| LA GOMERA       | -17.11  | 28.09  | 0.851           | 0.821            | 0.033         | 0.036          | -1.94     | -2.29      | 0.09  |
| ARRECIFE 2      | -13.53  | 28.97  | 0.879           | 0.944            | 0.027         | 0.018          | -0.69     | -0.11      | 0.01  |
| IMPERIA         | 8.02    | 43.88  | 0.849           | 0.844            | 0.040         | 0.037          | 0.66      | -0.20      | -0.02 |
| LIVORNO II      | 10.30   | 43.55  | 0.800           | 0.699            | 0.048         | 0.059          | 0.03      | -0.97      | -0.03 |
| OTRANTO II      | 18.50   | 40.15  | 0.836           | 0.896            | 0.044         | 0.036          | -1.81     | 0.20       | 0.03  |
| ANCONA II       | 13.51   | 43.62  | 0.825           | 0.845            | 0.051         | 0.051          | 1.51      | 2.24       | -0.07 |
| FORSMARK        | 18.21   | 60.41  | 0.903           | 0.959            | 0.072         | 0.048          | 2.68      | 0.97       | -5.97 |
| VISBY           | 18.28   | 57.64  | 0.932           | 0.971            | 0.052         | 0.034          | 2.70      | -0.57      | -1.50 |
| OSKARSHAMN      | 16.48   | 57.27  | 0.893           | 0.972            | 0.066         | 0.032          | 2.77      | 1.52       | -1.39 |
| SIMRISHAMN      | 14.36   | 55.56  | 0.926           | 0.918            | 0.044         | 0.049          | -0.66     | -0.48      | -0.39 |
| SKANOR          | 12.83   | 55.42  | 0.877           | 0.871            | 0.049         | 0.055          | 1.62      | 4.41       | -0.22 |
| BARSEBACK       | 12.90   | 55.76  | 0.891           | 0.854            | 0.046         | 0.059          | -0.93     | 1.51       | -0.32 |
| VIKEN           | 12.58   | 56.14  | 0.882           | 0.774            | 0.048         | 0.075          | 0.70      | 2.44       | -0.46 |
| RINGHALS        | 12.11   | 57.25  | 0.840           | 0.809            | 0.061         | 0.063          | 1.14      | 2.19       | -1.35 |
| STENUNGSUND     | 11.83   | 58.09  | 0.796           | 0.779            | 0.073         | 0.073          | 0.46      | 1.22       | -2.42 |
| KUNGSVIK        | 11.13   | 59.00  | 0.727           | 0.711            | 0.085         | 0.083          | 0.72      | 3.35       | -3.52 |
| CHRISTIANSTED H | -64.70  | 17.75  | 0.946           | 0.938            | 0.019         | 0.019          | 0.49      | 0.67       | 0.07  |
| LAMESHUR BAY    | -64.72  | 18.32  | 0.948           | 0.959            | 0.017         | 0.015          | -0.93     | -0.35      | 0.07  |
| MONA ISLAND     | -67.94  | 18.09  | 0.877           | 0.839            | 0.028         | 0.030          | 0.02      | 0.67       | 0.03  |
| TRIDENT PIER, P | -80.59  | 28.41  | 0.771           | 0.925            | 0.075         | 0.043          | -0.17     | -2.55      | 0.29  |
| ARENA COVE, CAL | -123.71 | 38.91  | 0.614           | 0.538            | 0.059         | 0.064          | 0.53      | -0.63      | 0.58  |
| SANTA BARBARA,  | -119.69 | 34.41  | 0.885           | 0.774            | 0.032         | 0.042          | 2.59      | 5.32       | 0.27  |
| PORT ANGELES, W | -123.44 | 48.12  | 0.848           | 0.872            | 0.056         | 0.051          | 0.87      | 1.22       | 0.64  |
| KAWAIHAE, HAWA  | -155.83 | 20.04  | 0.914           | 0.893            | 0.030         | 0.033          | -2.41     | -0.99      | -0.22 |
| BLUFF (SOUTHLAN | 168.35  | -46.60 | 0.787           | 0.824            | 0.041         | 0.034          | -3.78     | -5.84      | -0.29 |
| LANDSORT NORRA  | 17.86   | 58.77  | 0.921           | 0.940            | 0.060         | 0.052          | 1.24      | -0.96      | -3.16 |
| NOUMEA-NUMBO    | 166.42  | -22.24 | 0.863           | 0.931            | 0.029         | 0.020          | 1.02      | -2.13      | -0.17 |
| BONAVISTA       | -53.12  | 48.65  | 0.803           | 0.692            | 0.054         | 0.066          | 1.89      | -2.08      | 0.31  |
| REGGIO CALABRIA | 15.65   | 38.12  | 0.811           | 0.808            | 0.043         | 0.044          | 2.04      | 5.64       | 0.17  |
| PORTO GARIBALDI | 12.25   | 44.68  | 0.789           | 0.863            | 0.062         | 0.050          | -1.94     | -2.11      | -0.13 |
| HOEK VAN HOLLAN | 4.12    | 51.98  | 0.704           | 0.763            | 0.094         | 0.066          | -1.19     | 2.11       | 0.04  |
| WELLINGTON HARB | 174.78  | -41.28 | 0.611           | 0.536            | 0.053         | 0.049          | 5.64      | 3.09       | -0.37 |

Table S1. (continued)

| Station         | lon     | lat    | R <sub>cg</sub> | R <sub>ref</sub> | $\sigma_{cg}$ | $\sigma_{ref}$ | $y'_{cg}$ | $y'_{ref}$ | GIA   |
|-----------------|---------|--------|-----------------|------------------|---------------|----------------|-----------|------------|-------|
|                 | [°E]    | [°N]   |                 |                  | [cm]          |                | [mm/yr]   |            |       |
| LEWES (BREAKWAT | -75.12  | 38.78  | 0.735           | 0.820            | 0.070         | 0.059          | -2.08     | -1.60      | 1.14  |
| KETCHIKAN       | -131.62 | 55.33  | 0.810           | 0.845            | 0.068         | 0.059          | -2.33     | -2.50      | -0.21 |
| DEN HELDER      | 4.75    | 52.96  | 0.768           | 0.839            | 0.084         | 0.061          | 0.76      | 0.94       | 0.30  |
| CHARLESTON I    | -79.92  | 32.78  | 0.781           | 0.935            | 0.072         | 0.039          | -5.25     | -3.78      | 0.51  |
| BOSTON          | -71.05  | 42.35  | 0.633           | 0.674            | 0.071         | 0.057          | -2.38     | -0.80      | 0.49  |
| WEST-TERSCHELLI | 5.22    | 53.36  | 0.775           | 0.872            | 0.082         | 0.059          | 0.80      | 0.82       | 0.43  |
| DELFIJL         | 6.93    | 53.33  | 0.760           | 0.890            | 0.088         | 0.059          | -2.96     | -2.90      | 0.37  |
| LOS ANGELES     | -118.27 | 33.72  | 0.926           | 0.848            | 0.026         | 0.036          | -1.55     | 2.74       | 0.22  |
| PORT LYTTTELTON | 172.72  | -43.61 | 0.714           | 0.625            | 0.052         | 0.051          | -3.02     | -4.59      | -0.37 |
| HARLINGEN       | 5.41    | 53.18  | 0.722           | 0.834            | 0.098         | 0.073          | 1.17      | 0.96       | 0.36  |
| SEWELLS POINT,  | -76.33  | 36.95  | 0.776           | 0.749            | 0.072         | 0.069          | 3.71      | 0.93       | 0.62  |
| HILO, HAWAII I  | -155.06 | 19.73  | 0.897           | 0.900            | 0.032         | 0.031          | -3.75     | -2.70      | -0.21 |
| TREGDE          | 7.55    | 58.01  | 0.834           | 0.887            | 0.048         | 0.040          | -0.66     | -0.49      | -0.99 |
| ANNAPOLIS (NAVA | -76.48  | 38.98  | 0.627           | 0.703            | 0.117         | 0.088          | -0.12     | -1.84      | 0.96  |
| HEIMSJOEN       | 9.10    | 63.43  | 0.832           | 0.935            | 0.073         | 0.052          | 1.62      | 2.49       | -2.11 |
| IJMUIDEN        | 4.55    | 52.46  | 0.738           | 0.817            | 0.091         | 0.061          | 3.07      | 3.68       | 0.16  |
| OSCARSBORG      | 10.60   | 59.68  | 0.713           | 0.688            | 0.095         | 0.093          | -0.54     | 3.40       | -4.07 |
| KLAGSHAMN       | 12.89   | 55.52  | 0.898           | 0.894            | 0.045         | 0.050          | -0.57     | 2.02       | -0.25 |
| NEWPORT         | -71.33  | 41.51  | 0.798           | 0.841            | 0.047         | 0.040          | 0.22      | -0.07      | 1.03  |
| SANDY HOOK      | -74.01  | 40.47  | 0.794           | 0.749            | 0.061         | 0.061          | 2.85      | -1.67      | 1.32  |
| WOODS HOLE (OCE | -70.67  | 41.52  | 0.797           | 0.839            | 0.046         | 0.038          | -1.12     | -1.75      | 1.09  |
| PIRAIEVS        | 23.63   | 37.94  | 0.829           | 0.888            | 0.053         | 0.038          | 0.98      | -0.36      | 0.01  |
| SANTA MONICA (M | -118.50 | 34.01  | 0.928           | 0.852            | 0.025         | 0.035          | -0.49     | 3.25       | 0.20  |
| CRESCENT CITY   | -124.18 | 41.74  | 0.736           | 0.792            | 0.055         | 0.050          | 4.90      | 3.58       | 0.69  |
| FRIDAY HARBOR ( | -123.01 | 48.55  | 0.714           | 0.764            | 0.085         | 0.073          | -2.13     | -0.48      | 0.25  |
| ST. JOHN'S, NFL | -52.72  | 47.57  | 0.800           | 0.787            | 0.053         | 0.051          | -0.71     | -1.09      | 0.48  |
| FORT PULASKI    | -80.90  | 32.03  | 0.646           | 0.899            | 0.111         | 0.049          | -2.77     | -2.70      | 0.44  |
| SOLOMON'S ISLAN | -76.45  | 38.32  | 0.735           | 0.763            | 0.086         | 0.068          | 4.09      | -1.28      | 0.81  |
| SITKA           | -135.34 | 57.05  | 0.783           | 0.743            | 0.072         | 0.076          | 3.41      | 2.77       | -0.02 |
| CEDAR KEY II    | -83.03  | 29.14  | 0.816           | 0.882            | 0.068         | 0.051          | -3.02     | -3.10      | 0.24  |
| NEW LONDON      | -72.09  | 41.36  | 0.805           | 0.803            | 0.047         | 0.045          | 0.22      | 0.35       | 1.06  |
| PROVIDENCE (STA | -71.40  | 41.81  | 0.763           | 0.786            | 0.053         | 0.048          | -0.84     | -0.96      | 0.83  |
| ALAMEDA (NAVAL  | -122.30 | 37.77  | 0.752           | 0.664            | 0.044         | 0.048          | 2.23      | 0.18       | 0.40  |
| ST. NAZAIRE     | -2.20   | 47.27  | 0.700           | 0.714            | 0.074         | 0.068          | 3.86      | 4.30       | -0.02 |
| LA ROCHELLE-LA  | -1.22   | 46.16  | 0.693           | 0.673            | 0.074         | 0.071          | 3.64      | 1.05       | -0.10 |
| CHERBOURG       | -1.64   | 49.65  | 0.692           | 0.826            | 0.085         | 0.053          | -0.44     | 0.46       | -0.08 |
| STAVANGER       | 5.73    | 58.97  | 0.768           | 0.891            | 0.064         | 0.045          | 4.09      | 3.18       | -1.14 |
| MALOY           | 5.11    | 61.93  | 0.800           | 0.921            | 0.075         | 0.056          | 4.46      | 3.56       | -0.61 |
| ADAK SWEEPER C  | -176.63 | 51.86  | 0.867           | 0.825            | 0.043         | 0.048          | 1.82      | 2.74       | -0.10 |
| VALPARAISO      | -71.63  | -33.03 | 0.631           | 0.680            | 0.046         | 0.043          | -5.71     | -3.89      | -0.36 |
| PORT SAN LUIS   | -120.76 | 35.18  | 0.783           | 0.849            | 0.042         | 0.035          | 3.04      | 1.99       | 0.33  |
| ALESUND         | 6.15    | 62.47  | 0.804           | 0.913            | 0.078         | 0.060          | 4.15      | 2.80       | -0.85 |
| KWAJALEIN       | 167.74  | 8.73   | 0.968           | 0.978            | 0.018         | 0.015          | -1.15     | -0.63      | -0.15 |
| MONTAUK         | -71.96  | 41.05  | 0.831           | 0.850            | 0.043         | 0.039          | 1.27      | 1.07       | 1.24  |
| ST. PETERSBURG  | -82.63  | 27.76  | 0.835           | 0.865            | 0.055         | 0.051          | -0.91     | -3.46      | 0.20  |
| KAHULUI HARBOR, | -156.48 | 20.89  | 0.934           | 0.857            | 0.022         | 0.034          | -0.24     | 2.20       | -0.21 |
| MIDWAY ISLAND   | -177.36 | 28.21  | 0.823           | 0.828            | 0.039         | 0.039          | 0.18      | 0.02       | -0.19 |
| GRAND ISLE      | -89.96  | 29.26  | 0.869           | 0.904            | 0.055         | 0.047          | -2.66     | -4.10      | 0.47  |
| APRA HARBOR     | 144.65  | 13.44  | 0.969           | 0.986            | 0.026         | 0.016          | -0.31     | -0.23      | -0.15 |
| BODO            | 14.39   | 67.29  | 0.814           | 0.941            | 0.088         | 0.052          | -1.46     | 1.02       | -1.56 |
| GIBARA          | -76.12  | 21.11  | 0.801           | 0.812            | 0.050         | 0.048          | 4.38      | 2.46       | -0.12 |
| CORDOVA         | -145.75 | 60.56  | 0.868           | 0.928            | 0.068         | 0.048          | 5.38      | 1.37       | -0.04 |
| BERGEN          | 5.32    | 60.40  | 0.722           | 0.904            | 0.075         | 0.045          | 5.12      | 1.53       | -1.37 |
| GENOVA          | 8.90    | 44.40  | 0.811           | 0.724            | 0.047         | 0.056          | 1.61      | -0.47      | -0.09 |
| WAKE ISLAND     | 166.62  | 19.29  | 0.900           | 0.945            | 0.034         | 0.026          | -0.91     | 0.25       | -0.17 |
| OSLO            | 10.73   | 59.91  | 0.696           | 0.687            | 0.103         | 0.096          | -0.94     | 3.71       | -4.33 |



**Table S1.** (continued)

| Station         | lon     | lat    | R <sub>cg</sub> | R <sub>ref</sub> | $\sigma_{cg}$ | $\sigma_{ref}$ | $y'_{cg}$ | $y'_{ref}$ | GIA   |
|-----------------|---------|--------|-----------------|------------------|---------------|----------------|-----------|------------|-------|
|                 | [°E]    | [°N]   |                 |                  | [cm]          |                | [mm/yr]   |            |       |
| KIPTOPEKE BEACH | -75.99  | 37.16  | 0.825           | 0.836            | 0.062         | 0.053          | 2.90      | -1.73      | 0.72  |
| TOWNSVILLE I    | 146.83  | -19.25 | 0.795           | 0.767            | 0.051         | 0.052          | -2.22     | -0.33      | -0.29 |
| REYKJAVIK       | -21.94  | 64.15  | 0.792           | 0.930            | 0.064         | 0.032          | -1.34     | -3.11      | -1.46 |
| KRISTIANSUND    | 7.73    | 63.11  | 0.798           | 0.923            | 0.079         | 0.058          | 2.21      | 2.91       | -1.40 |
| BURNIE          | 145.91  | -41.05 | 0.747           | 0.797            | 0.052         | 0.039          | -2.07     | -1.59      | -0.27 |
| OLANDS NORRA UD | 17.10   | 57.37  | 0.905           | 0.974            | 0.063         | 0.032          | 0.52      | -1.49      | -1.42 |
| KUNGSHOLMSFORT  | 15.59   | 56.11  | 0.928           | 0.933            | 0.047         | 0.048          | 2.44      | 0.52       | -0.61 |
| NEZUGASEKI      | 139.55  | 38.56  | 0.882           | 0.856            | 0.054         | 0.062          | -2.60     | -2.91      | -0.43 |
| NAWILIWILI BAY, | -159.35 | 21.95  | 0.915           | 0.897            | 0.024         | 0.027          | -0.07     | 0.12       | -0.18 |
| UNALASKA        | -166.54 | 53.88  | 0.947           | 0.925            | 0.034         | 0.038          | 2.51      | 3.08       | 0.03  |
| MAGUEYES ISLAND | -67.05  | 17.97  | 0.929           | 0.888            | 0.021         | 0.028          | -0.08     | 0.57       | 0.07  |
| STOCKHOLM       | 18.08   | 59.32  | 0.908           | 0.955            | 0.067         | 0.046          | 3.35      | 0.71       | -4.03 |
| REEDY POINT     | -75.57  | 39.56  | 0.587           | 0.687            | 0.109         | 0.092          | -2.00     | -0.56      | 1.17  |
| MONACO (FONTVIE | 7.42    | 43.73  | 0.859           | 0.856            | 0.038         | 0.034          | 0.94      | 0.68       | 0.01  |
| LEIXOES         | -8.70   | 41.18  | 0.703           | 0.822            | 0.052         | 0.040          | -0.85     | 0.33       | -0.20 |
| SAKAI           | 133.24  | 35.55  | 0.958           | 0.960            | 0.040         | 0.039          | -0.49     | -1.83      | -0.36 |
| UNO             | 133.95  | 34.49  | 0.797           | 0.898            | 0.090         | 0.060          | 1.79      | 1.04       | -0.44 |
| LORD HOWE ISLAN | 159.07  | -31.52 | 0.901           | 0.851            | 0.063         | 0.080          | 0.76      | 2.44       | 0.00  |
| MAR DEL PLATA ( | -57.52  | -38.03 | 0.622           | 0.597            | 0.084         | 0.081          | -1.22     | 3.99       | -0.42 |
| MOKUOLOE ISLAND | -157.79 | 21.43  | 0.920           | 0.923            | 0.025         | 0.025          | -1.35     | -2.46      | -0.19 |
| QUEEN CHARLOTTE | -132.07 | 53.25  | 0.887           | 0.819            | 0.040         | 0.050          | -0.74     | -3.82      | 1.03  |
| RATAN           | 20.89   | 63.99  | 0.867           | 0.953            | 0.099         | 0.058          | -1.43     | -0.77      | -9.35 |
| MAASSLUIS       | 4.25    | 51.92  | 0.679           | 0.712            | 0.100         | 0.073          | -1.34     | 2.14       | 0.03  |
| DARWIN          | 130.85  | -12.47 | 0.698           | 0.926            | 0.106         | 0.045          | -0.58     | -1.62      | -0.29 |
| MOKPO           | 126.38  | 34.78  | 0.823           | 0.870            | 0.083         | 0.069          | 3.52      | 3.56       | -0.39 |
| BUSAN           | 129.04  | 35.10  | 0.883           | 0.897            | 0.062         | 0.056          | -1.34     | -0.02      | -0.43 |
| SETE            | 3.70    | 43.40  | 0.785           | 0.860            | 0.047         | 0.036          | -2.84     | -0.88      | -0.09 |
| DEVONPORT       | -4.19   | 50.37  | 0.774           | 0.806            | 0.058         | 0.063          | -4.29     | -0.01      | 0.12  |
| COCOS ISLAND (H | 96.89   | -12.12 | 0.951           | 0.974            | 0.034         | 0.024          | -3.11     | -2.07      | -0.06 |
| BELLA BELLA     | -128.13 | 52.17  | 0.808           | 0.880            | 0.068         | 0.053          | -0.12     | 0.59       | -1.14 |
| PORT TARANAKI   | 174.03  | -39.06 | 0.588           | 0.784            | 0.057         | 0.038          | -4.30     | -2.66      | -0.40 |
| ULSAN           | 129.39  | 35.50  | 0.883           | 0.911            | 0.059         | 0.047          | -1.62     | -0.07      | -0.41 |
| mean            | -       | -      | 0.818           | 0.841            | 0.057         | 0.049          | 0.17      | -0.11      | -0.27 |
